# Supplementary material
Source: ML conference proceedings conference paper supplement (https://proceedings.neurips.cc/paper_files/paper/2016/hash/b5488aeff42889188d03c9895255cecc-Abstract.html)
Supplement: Supplementary file [file b5488aeff42889188d03c9895255cecc-Supplemental.zip]

# Teaching by Demonstration Supplementary Materials

Mark K Ho, Michael L. Littman, James MacGlashan,  
Fiery Cushman, Joseph L. Austerweil

September 2016

## Appendix 1: An Example with 2 Goals

Suppose we have a 3x2 gridworld with two possible terminal goals (X and Y) and a starting position as shown in Figure 1i. We assume no step costs and  $\gamma = .99$ . We restrict our analysis to trajectories of length 2 that terminate at a goal state. Thus there are 4 trajectories considered.

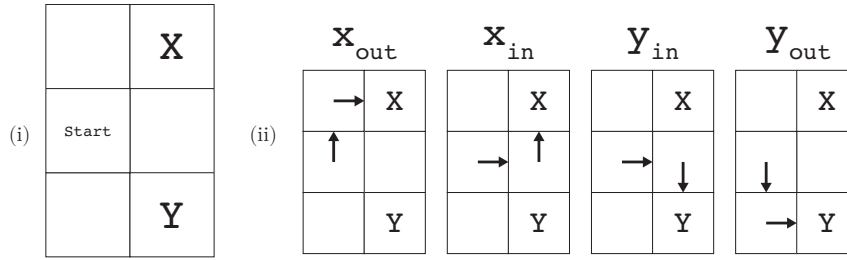

Figure 1: (i) Gridworld with 2 possible goal states (labeled X and Y) and a single starting state. (ii) All trajectories of length 2 that terminate at a goal state.

## Proof

The purpose of this proof is to show that certain trajectories have higher probability of being chosen by a demonstrator who is "showing" as opposed to "doing" a task, even when all trajectories enter a goal. The prior probability over goals is uniform.

The following inequalities for a goal  $g \in G = \{X, Y\}$  given a trajectory  $j \in J = \{x_{in}, x_{out}, y_{in}, y_{out}\}$  will hold when a softmax policy or  $\epsilon$ -greedy policy is used to calculate the standard planning distribution:

$$P_{\text{Doing}}(x_{\text{out}} | X) \geq P_{\text{Doing}}(x_{\text{in}} | X) > 0 \quad (1)$$

$$P_{\text{Doing}}(x_{\text{in}} | Y) > P_{\text{Doing}}(x_{\text{out}} | Y) > 0. \quad (2)$$

An observer watching a standard planner uses Bayes rule to infer the goal being pursued:

$$P_{\text{Observing}}(G = g | J = j) = \frac{P_{\text{Doing}}(J = j | G = g)}{\sum_{g'} P_{\text{Doing}}(J = j | G = g')}. \quad (3)$$

The inequalities in (1) and (2) entail the following inequality<sup>1</sup>:

$$\frac{P_{\text{Doing}}(x_{\text{out}} | X)}{P_{\text{Doing}}(x_{\text{out}} | X) + P_{\text{Doing}}(x_{\text{out}} | Y)} > \frac{P_{\text{Doing}}(x_{\text{in}} | X)}{P_{\text{Doing}}(x_{\text{in}} | X) + P_{\text{Doing}}(x_{\text{in}} | Y)}. \quad (4)$$

$$P_{\text{Observing}}(X | x_{\text{out}}) > P_{\text{Observing}}(X | x_{\text{in}}). \quad (5)$$

That is, observing  $x_{\text{out}}$  provides better evidence that  $X$  is the goal than observing  $x_{\text{in}}$ . Since an agent that is showing an observer will choose as follows:

$$P_{\text{Showing}}(J = j | G = g) = \frac{P_{\text{Observing}}(G = g | J = j)^\alpha}{\sum_{j'} P_{\text{Observing}}(G = g | J = j')^\alpha}, \quad (6)$$

then,

$$\frac{P_{\text{Observing}}(X | x_{\text{out}})^\alpha}{\sum_{j'} P_{\text{Observing}}(X | j')^\alpha} > \frac{P_{\text{Observing}}(X | x_{\text{in}})^\alpha}{\sum_{j'} P_{\text{Observing}}(X | j')^\alpha} \quad (7)$$

$$P_{\text{Showing}}(x_{\text{out}} | X) > P_{\text{Showing}}(x_{\text{in}} | X) \quad (8)$$

Intuitively, the different probabilities of  $x_{\text{out}}$  and  $x_{\text{in}}$  when  $Y$  is the goal allows a showing agent to "break the symmetry" between  $x_{\text{out}}$  and  $x_{\text{in}}$  when  $X$  is the goal. Analogous calculations can show that  $P_{\text{Showing}}(y_{\text{out}} | Y) > P_{\text{Showing}}(y_{\text{in}} | Y)$ .

---

<sup>1</sup>For  $a, b, c, d > 0$  if  $a \geq b$  and  $c > d$ , then:

$$\begin{aligned} ac &> bd \\ ab + ac &> bd + ab \\ a(b + c) &> b(a + d) \\ \frac{a}{a + d} &> \frac{b}{b + c} \end{aligned}$$

## Appendix 2: Experiment 2 Model Fits

Table 1: Experiment 2 Maximum Median Likelihood Model Parameters

|                         |           | Doing Condition   |            |           |           |            |           |           |            |
|-------------------------|-----------|-------------------|------------|-----------|-----------|------------|-----------|-----------|------------|
|                         |           | ooo               | oox        | oxo       | oxx       | xoo        | xox       | xxo       | xxx        |
| Standard Planning Model | $\lambda$ | 0.02              | 0.02       | 0.02      | 0.02      | 0.02       | 0.04      | 0.02      | 0.02       |
| Pedagogical Model       | $l_{max}$ | 7                 | 7          | 9         | 9         | 9          | 7         | 9         | 7          |
|                         | $\alpha$  | 2                 | 1          | 1         | 1         | 1          | 20        | 1         | 1          |
|                         | $p_{min}$ | $10^{-6}$         | $10^{-10}$ | $10^{-6}$ | $10^{-7}$ | $10^{-6}$  | $10^{-5}$ | $10^{-7}$ | $10^{-10}$ |
|                         | $\lambda$ | 0.05              | 0.20       | 0.10      | 0.20      | 0.10       | 0.20      | 0.05      | 0.20       |
|                         |           | Showing Condition |            |           |           |            |           |           |            |
|                         |           | ooo               | oox        | oxo       | oxx       | xoo        | xox       | xxo       | xxx        |
| Standard Planning Model | $\lambda$ | 0.08              | 0.10       | 0.02      | 0.02      | 0.30       | 0.09      | 0.02      | 0.02       |
| Pedagogical Model       | $l_{max}$ | 7                 | 9          | 9         | 9         | 11         | 9         | 9         | 7          |
|                         | $\alpha$  | 1                 | 10         | 20        | 1         | 1          | 5         | 1         | 1          |
|                         | $p_{min}$ | $10^{-10}$        | $10^{-7}$  | $10^{-7}$ | $10^{-7}$ | $10^{-10}$ | $10^{-5}$ | $10^{-7}$ | $10^{-10}$ |
|                         | $\lambda$ | 0.20              | 0.05       | 0.05      | 0.20      | 0.20       | 0.05      | 0.05      | 0.20       |

Note: The codes for the reward functions refer to which tiles were safe (o) and which were dangerous (x) with the ordering <orange, purple, cyan>.
